# Supplementary material
Source: ML conference proceedings conference paper supplement (https://proceedings.neurips.cc/paper_files/paper/2023/hash/543ec10715d964122ab7cb15f648772b-Abstract.html)
Supplement: Supplementary file 1 [file 543ec10715d964122ab7cb15f648772b-Supplemental-Conference.zip]

Archive with 6 entries (6 files):
- gnn_inter_code_implementation.zip
- __MACOSX/._gnn_inter_code_implementation.zip
- gnn_inter_main_full.pdf
- __MACOSX/._gnn_inter_main_full.pdf
- README.txt
- __MACOSX/._README.txt
