# Supplementary material
Source: ML conference proceedings conference paper supplement (https://proceedings.neurips.cc/paper_files/paper/2023/hash/543ec10715d964122ab7cb15f648772b-Abstract.html)
Supplement: Supplementary file 1 [file 543ec10715d964122ab7cb15f648772b-Supplemental-Conference.zip › README.txt]

Dear reviewers,

We provide the following as supplementary material:

1. gnn_inter_main_full.pdf: A unified version of the paper containing the submitted body as well as the appendix. The appendix includes the formal analysis, extensions, proofs, and further implementation details. We emphasize that the body of the paper is identical to the submitted version, and strongly encourage to use the unified version supplied here for convenience (e.g. references to appendix will link to relevant location).

2. gnn_inter_code_implementation.zip: Zip with code implementation for reproducing experiments in the paper. Includes a README.md file with instructions.

Sincerely,
Authors
